# Supplementary material for: Changes of Water and Muscle Content in Paraspinal Muscle Degeneration and Gender Differences During Aging Using Dual-Energy CT
Source: Research Square preprint supplement (doi:10.21203/rs.3.rs-6237350/v1), 2025-03-31
Supplement: Supplementary file 1 [file 6b1485d9af9e50ea1359cf29.docx]

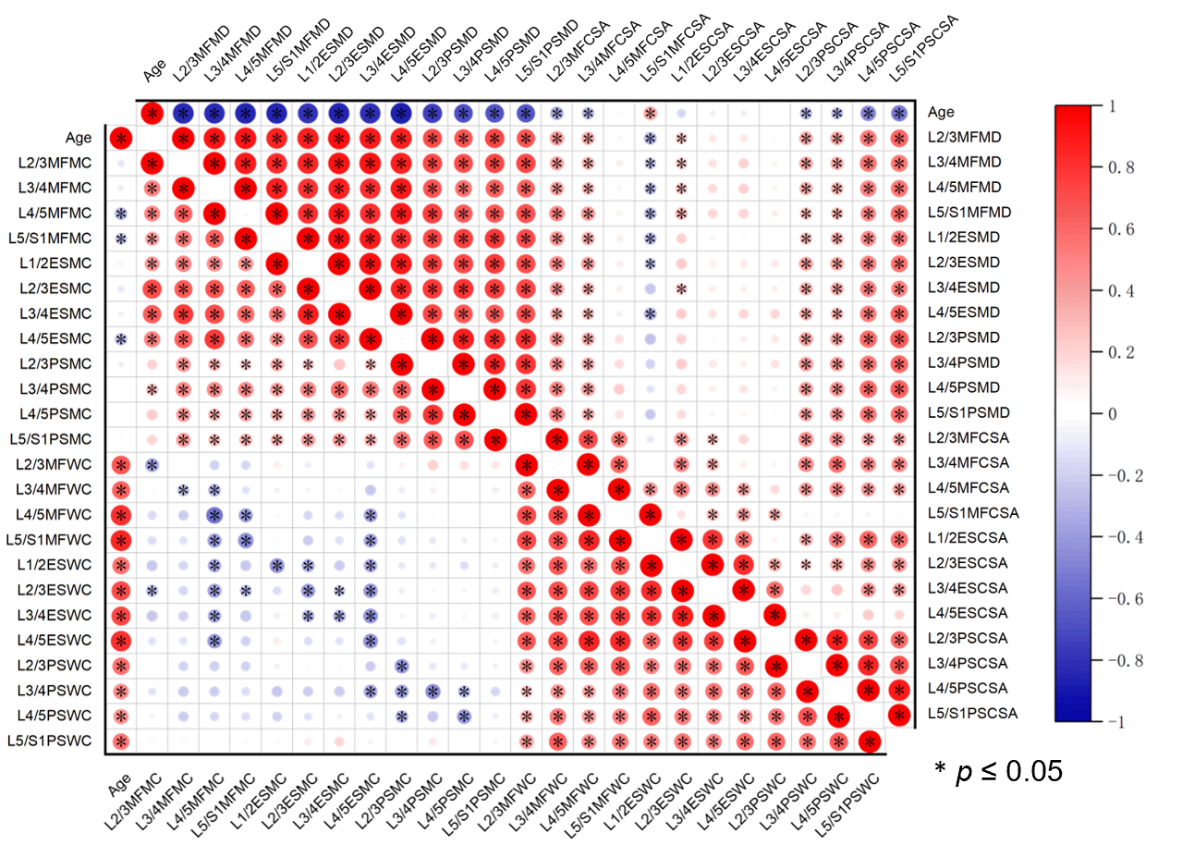


**Figure S1** The correlation between paraspinal muscle parameters and age in males. Blue indicates a negative correlation, while red represents a positive correlation; the deeper the color and the larger the area of the block, the higher the correlation.


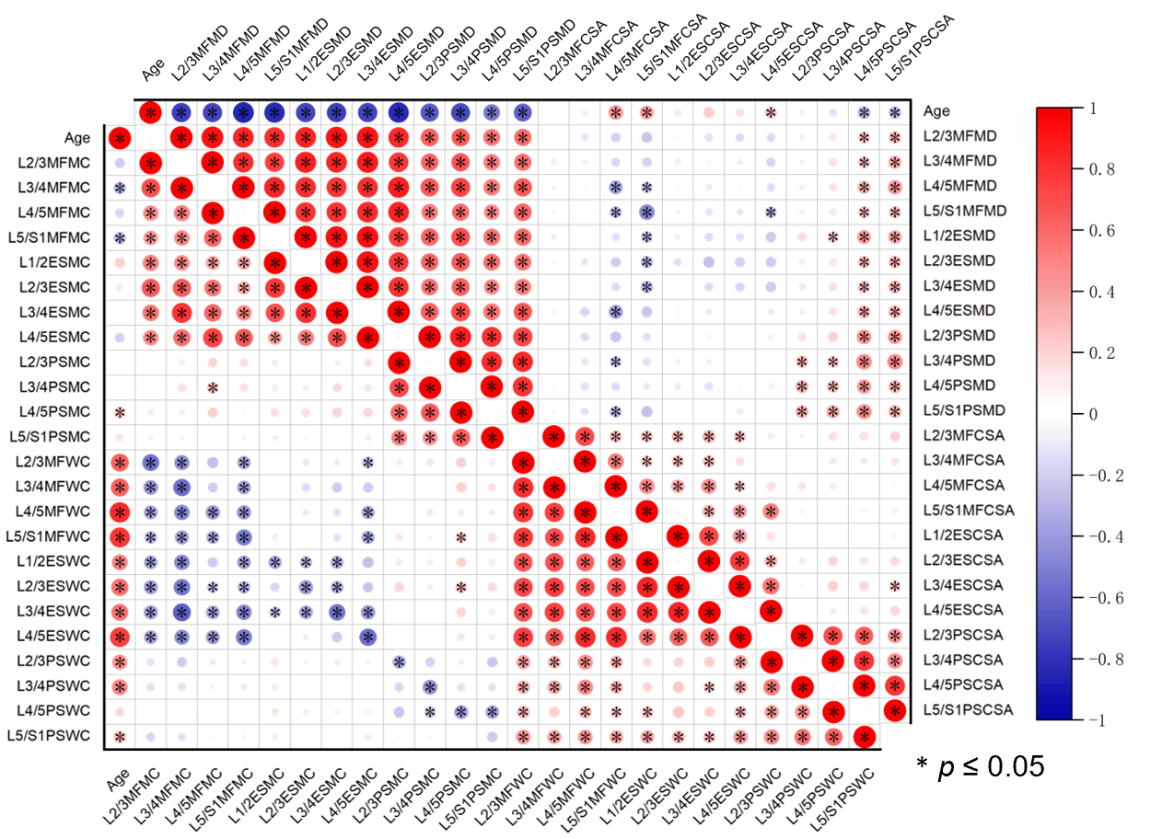


**Figure S2** The correlation between paraspinal muscle parameters and age in females. Blue indicates a negative correlation, while red represents a positive correlation; the deeper the color and the larger the area of the block, the higher the correlation.
